# Supplementary material for: Easily fabricated and lightweight PPy/PDA/AgNW composites for excellent electromagnetic interference shielding
Source: Royal Society of Chemistry journal article supplement (doi:10.1039/c7nr05951e), 2017-01-01
Supplement: c7nr05951e1.pdf [file c7nr05951e1.pdf]

## Supplementary Information

### **Easily Fabricated and Lightweight PPy/PDA/AgNW Composites for Excellent Electromagnetic Interference Shielding**

Yan Wang,<sup>a</sup> Fu-qiang Gu,<sup>a</sup> Li-juan Ni,<sup>a</sup> Kun Liang,<sup>b</sup> Kyle Marcus,<sup>b</sup> Shu-li Liu,<sup>a</sup> Fan Yang,<sup>a</sup>

Jin-ju Chen<sup>\*a</sup> and Zhe-sheng Feng<sup>\*a</sup>

<sup>a</sup>State Key Laboratory of Electronic Thin Films and Integrated Devices, University of  
Electronic Science and Technology of China, Chengdu 610054, P. R. China.

E-mail: jinjuchen@uestc.edu.cn, fzs@uestc.edu.cn

<sup>b</sup>Nanoscience Technology Center, University of Central Florida, Orlando, FL 32826, USA.

**Table S1** Thickness, density, AgNW volume fraction, electrical conductivity and skin depth of PPy/PDA/AgNW composite with different AgNW loading degree

| AgNW loading degree (wt.%) | thickness ( $\mu\text{m}$ ) | density ( $\text{g}/\text{cm}^3$ ) | AgNW volume fraction (vol %) | electrical conductivity ( $\text{S}/\text{cm}$ ) | skin depth ( $\mu\text{m}$ ) |
|----------------------------|-----------------------------|------------------------------------|------------------------------|--------------------------------------------------|------------------------------|
| 0                          | 73.2                        | 0.289                              | 0                            | 0.0108                                           | 5404                         |
| 1                          | 73.6                        | 0.290                              | 0.00028                      | 0.0180                                           | 4199                         |
| 3                          | 74.5                        | 0.292                              | 0.00084                      | 0.0191                                           | 4068                         |
| 5                          | 77.5                        | 0.287                              | 0.0014                       | 0.0217                                           | 3817                         |
| 10                         | 84.7                        | 0.277                              | 0.0026                       | 0.0291                                           | 3299                         |
| 12                         | 85.3                        | 0.283                              | 0.0032                       | 0.03528                                          | 2995                         |
| 14                         | 87.9                        | 0.279                              | 0.0037                       | 0.05456                                          | 2409                         |
| 16                         | 90.7                        | 0.281                              | 0.0043                       | 0.10763                                          | 1715                         |
| 20                         | 95.1                        | 0.278                              | 0.0053                       | 54.77                                            | 76.04                        |
| 25                         | 97.6                        | 0.288                              | 0.0069                       | 263.39                                           | 34.67                        |
| 30                         | 102.9                       | 0.293                              | 0.0084                       | 424.19                                           | 27.32                        |
| 35                         | 108.8                       | 0.311                              | 0.0099                       | 578.06                                           | 23.40                        |
| 40                         | 115.8                       | 0.304                              | 0.0116                       | 1035.44                                          | 17.49                        |
| 45                         | 120.3                       | 0.317                              | 0.0137                       | 1140.27                                          | 16.67                        |
| 50                         | 127.1                       | 0.332                              | 0.0158                       | 1206.72                                          | 16.20                        |

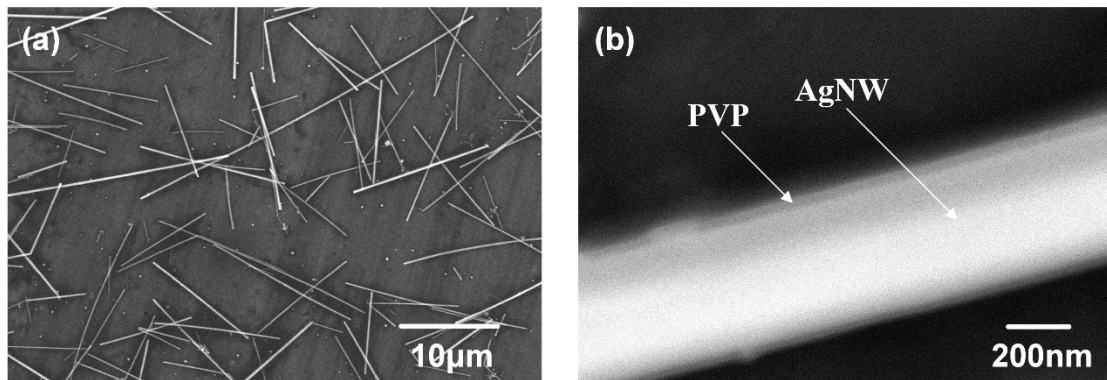

**Fig. S1** SEM images of AgNW with different magnification: (a)  $\times 2000$ , (b)  $\times 70000$ .

From the images, the length and diameter of AgNW are evaluated to be  $15.2 \pm 6.8 \mu\text{m}$  and  $0.365 \pm 0.035 \mu\text{m}$ , respectively.

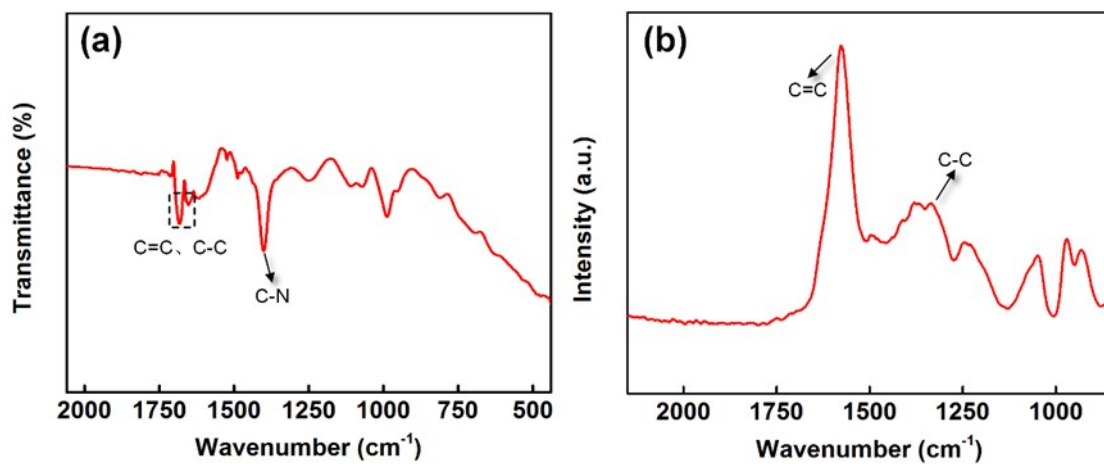

**Fig. S2** (a) FT-IR and (b) Raman spectra of pure PPy.

The characteristic signal of pure PPy can be found from spectra above. In the FT-IR spectrum, the C-N stretching is found at  $1428\text{ cm}^{-1}$ , and the band at around  $1635\text{ cm}^{-1}$  can be attributed to C=C and C-C in pyrrole ring-stretching.<sup>1</sup> In the Raman spectrum, the C=C and C-C stretching vibration are merged into peaks at  $1591\text{ cm}^{-1}$  and  $1376\text{ cm}^{-1}$ .<sup>2</sup>

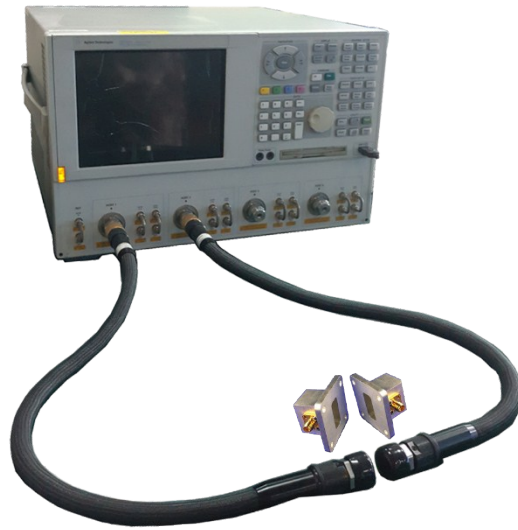

**Fig. S3** The experiment setup (Vector network analyzer and waveguide sample holder) for EMI shielding measurement (S-parameters).

Vector network analyzer directly gives the output in form of four scattering parameters ( $S_{11}$ ,  $S_{12}$ ,  $S_{21}$ ,  $S_{22}$ ). The samples were cut into a rectangular shape, slightly larger in dimension ( $24 \times 12 \text{ mm}^2$ ) as compared to the opening of the sample holder ( $22.84 \times 10.14 \text{ mm}^2$ ).

About S-parameters:

The reflection (R) and transmission (T) coefficients were obtained from the network analyzer in form of scattering parameters, “ $S_{mn}$ ”, which measure how energy is scattered from a material or device. The first letter “m” designate the network analyzer port receiving the EMI radiation and the second letter “n”, represents the port that is transmitting the incident energy.

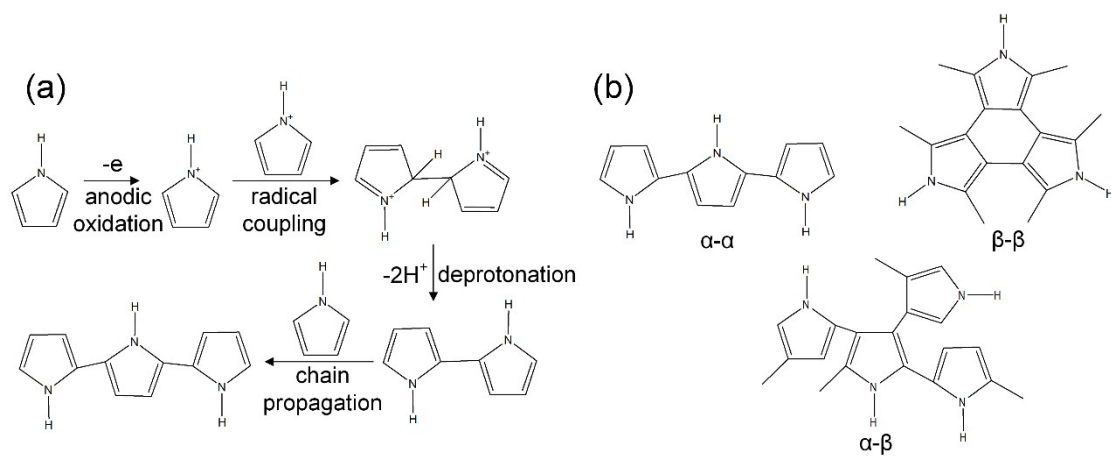

**Fig. S4** (a) a possible polymerization mechanism of polypyrrole (PPy), (b) three basic modes of PPy polymerization.

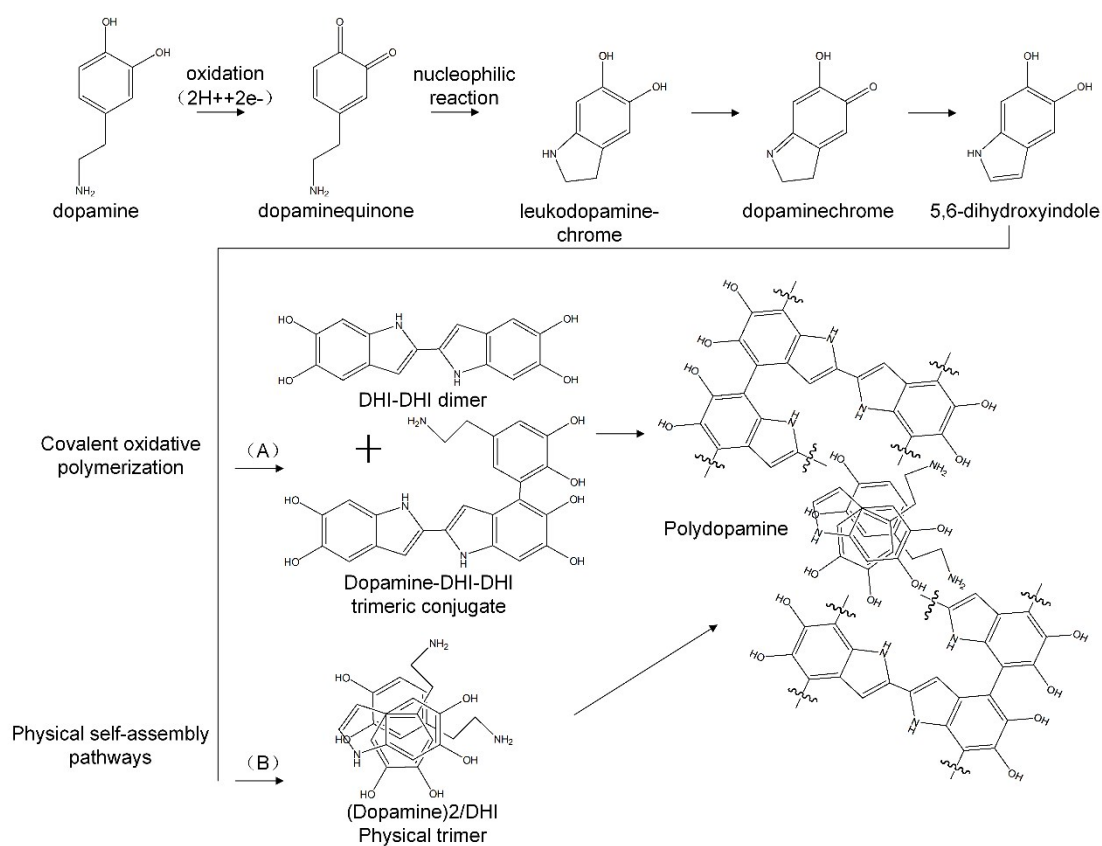

**Fig. S5** A possible polymerization mechanism of polydopamine (PDA).

## References

- 1 W. Zhang, F. K. Yang, Z. H. Pan, J. Zhang and B. X. Zhao, *Macromol. Rapid Comm.*, 2014, **35**, 350-354.
- 2 T. I. W. Schnoor, G. Smith, D. Eder, K. K. K. Koziol, G. T. Burstein, A. H. Windle and K. Schulte, *Carbon*, 2013, **60**, 229-235.
